# Supplementary material for: Combined quantification of procalcitonin and HLA-DR improves sepsis detection in surgical patients
Source: PubMed Central journal article supplement (PMC6086887; doi:10.1038/s41598-018-30505-7), 2018-08-10
Supplement: 41598_2018_30505_MOESM1_ESM.pdf [file 41598_2018_30505_MOESM1_ESM.pdf]

**Combined quantification of procalcitonin and HLA-DR improves sepsis detection in surgical patients.**

Raquel Almansa , Silvia Martín , Marta Martin-Fernandez, María Heredia-Rodríguez , Esther Gómez-Sánchez, Marta Aragón, Cristina Andrés, Dolores Calvo, Jesus Rico-Feijoo, Maria Carmen Esteban-Velasco, Luis Mario Vaquero-Roncero , Alicia Ortega , Estefania Gómez-Pesquera , Mario Lorenzo-López , Iñigo López de Cenarruzabeitia , Diana Benavides, Jaime López-Sanchez, Cristina Doncel , Carmen González-Sanchez , Esther Zarca, Alberto Ríos-Llorente, Agustín Diaz, Elisa Sanchez-Barrado, Juan Beltran de Heredia, Jose Maria Calvo-Vecino , Luis Muñoz Bellvís, Jose Ignacio Gomez-Herreras, César Aldecoa, Eduardo Tamayo, and Jesus F. Bermejo-Martin

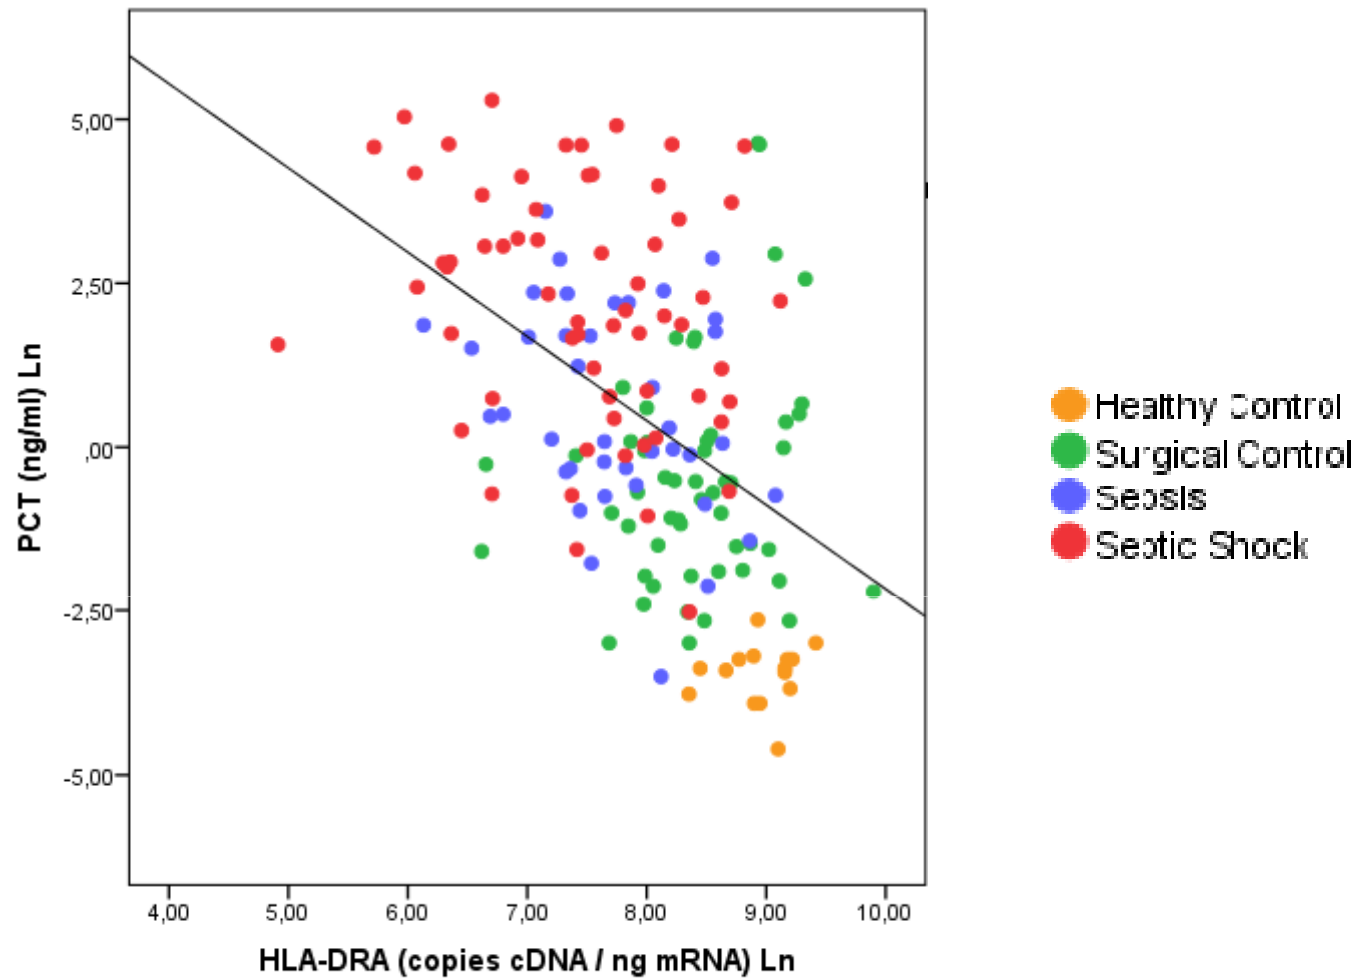

**Supp file 1: Correlation between PCT and HLA-DRA gene expression levels in blood in the derivation cohort. Correlation Spearman coefficient = 0.466,  $p < 0.001$ .**

**A**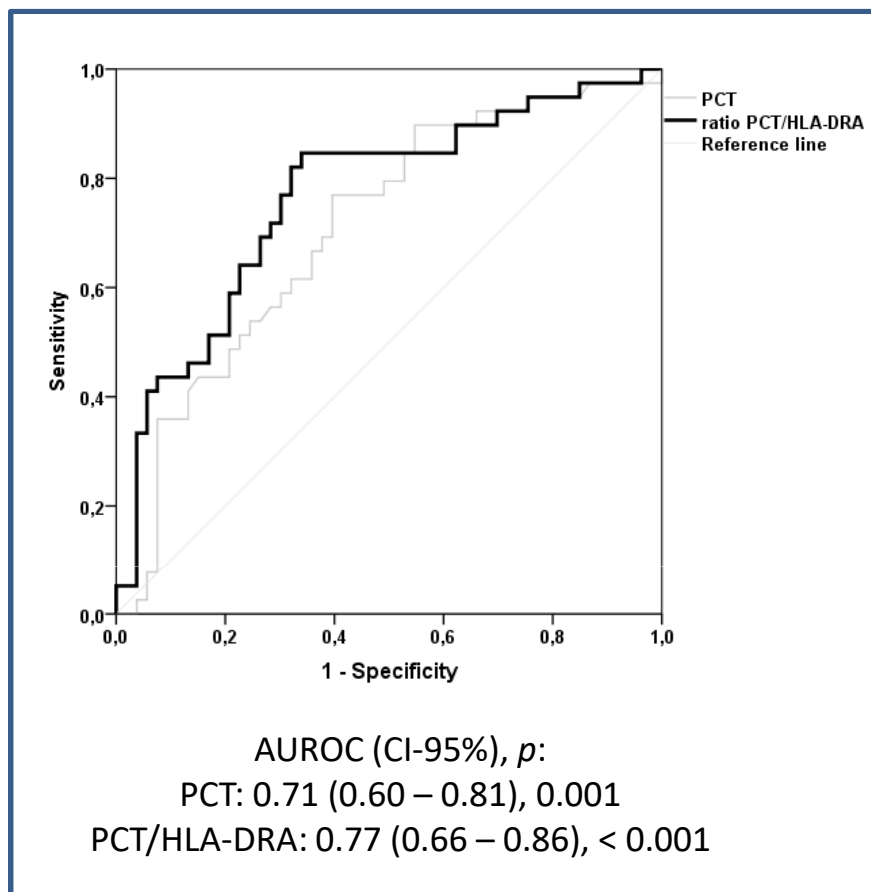**B**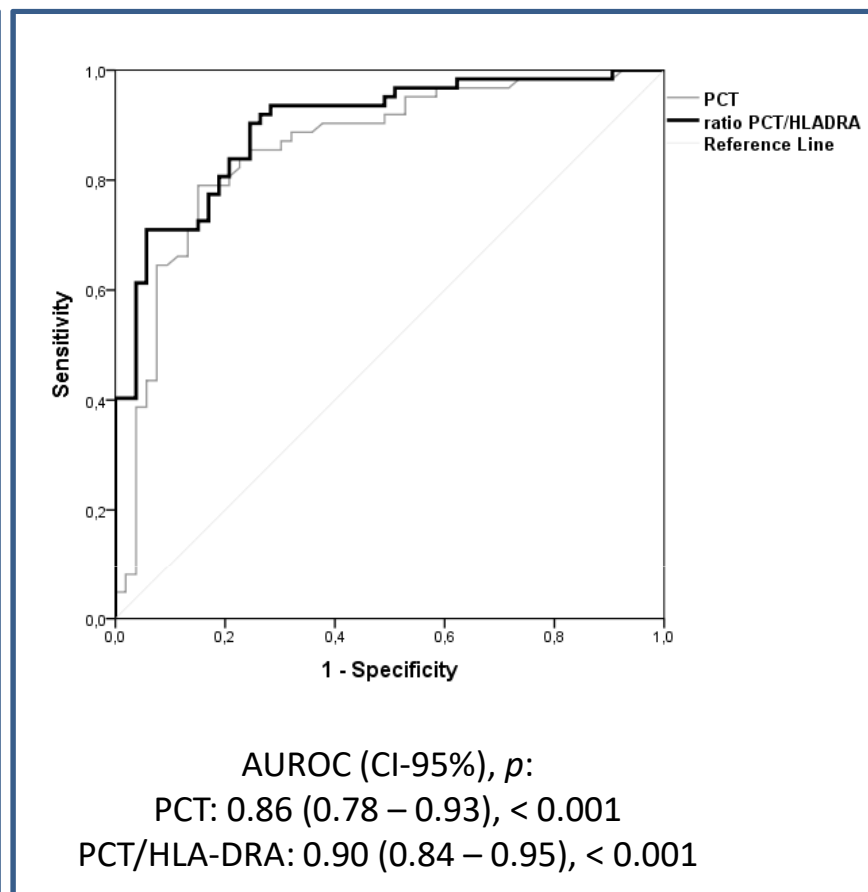

**Supp file 2: A) AUROC analysis for the differential diagnosis between sepsis patients with no Septic Shock (n = 39) and surgical controls with no infection in the derivation cohort (n = 53). B) AUROC analysis for the differential diagnosis between sepsis patients with Septic Shock (n = 62) and surgical controls with no infection in the derivation cohort (n = 53).**
